# Supplementary figures and images for: Cells on Hydrogels with Micron-Scaled Stiffness Patterns Demonstrate Local Stiffness Sensing
Source: MDPI journal article supplement (doi:10.3390/nano12040648), 2022-02-15

A)

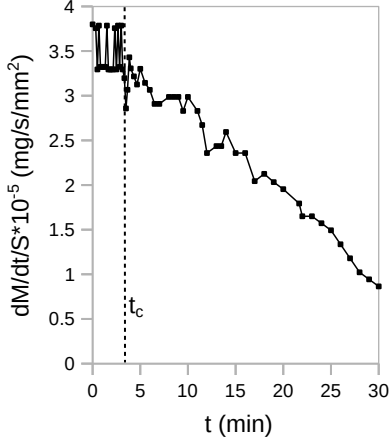

B)

| Y (kPa) | tc (min)  |
|---------|-----------|
| 3.3     | 3.3+/-0.3 |
| 11.8    | 6.5+/-0.3 |
| 24.7    | 8.1+/-0.2 |

Supplement: s1 [file s1]

A)

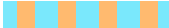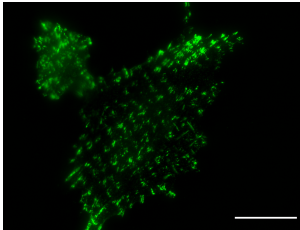

B)

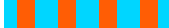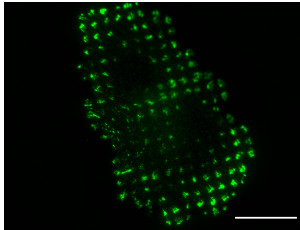

Supplement: s1 [file s1]

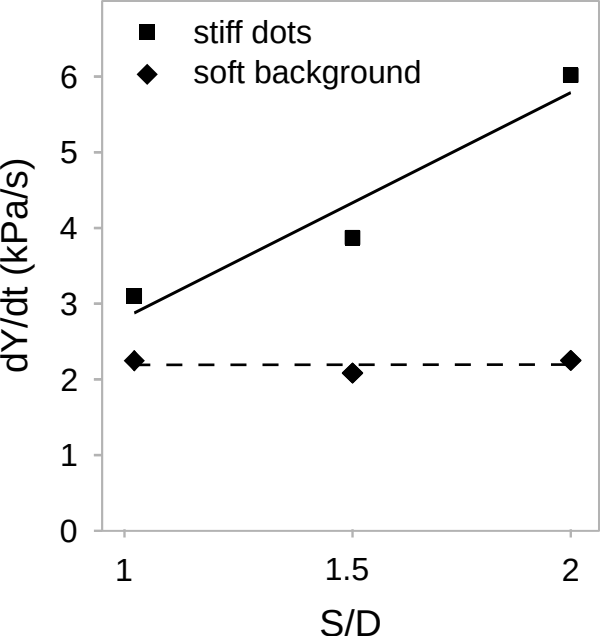

Supplement: s1 [file s1]

A)

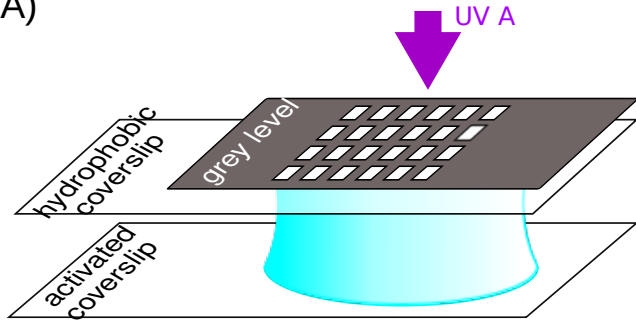

B)

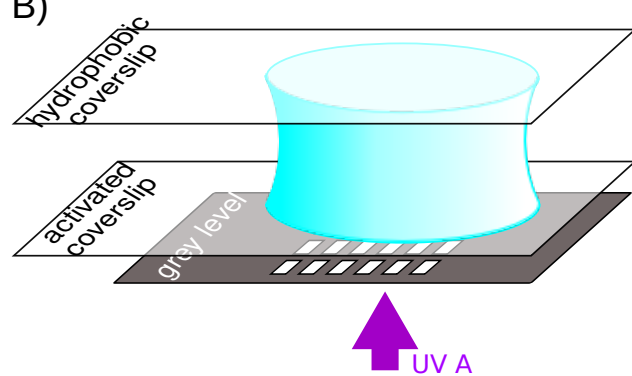

C)

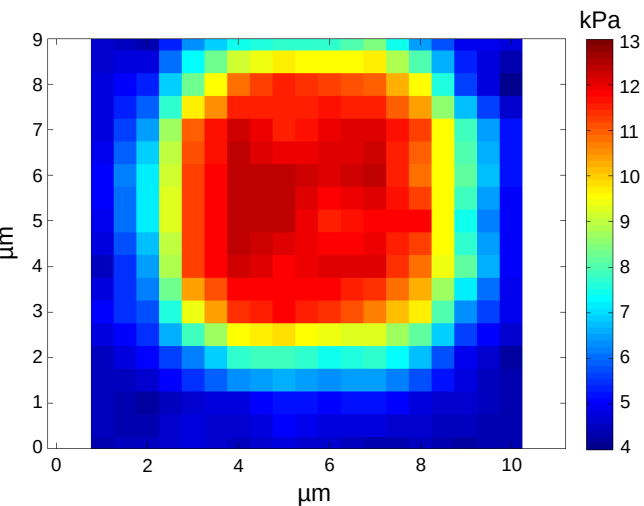

D)

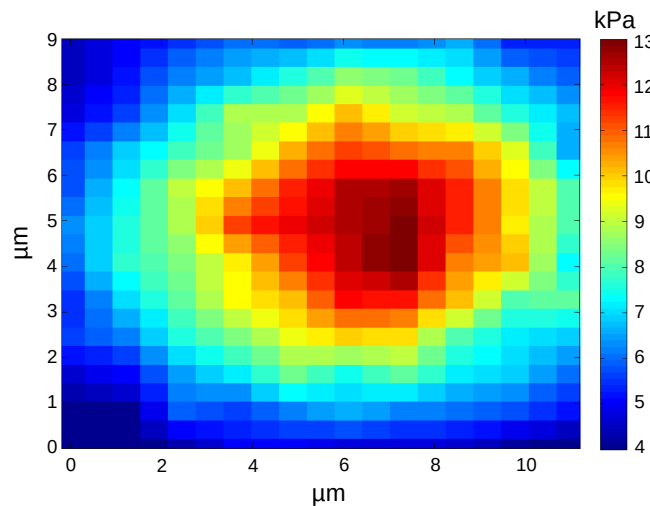

Supplement: s1 [file s1]
